# Supplementary material for: Plasma-Functionalised Dressings for Enhanced Wound Healing
Source: MDPI journal article supplement (doi:10.3390/ijms24010797), 2023-01-02
Supplement: s1 [file s1]

Supplementary Table S1.

| Elements and Peak Fits                 | Binding Energy | Acrylic Acid | Allylamine | Melolin |
|----------------------------------------|----------------|--------------|------------|---------|
| O1s                                    | 532eV          | 29.4%        | 5.13%      | 21.17%  |
| C1s                                    | 285eV          | 70.96%       | 78.54%     | 77.03%  |
| N                                      | 399eV          |              | 15.22%     |         |
| F                                      | 688eV          |              | 1.11%      | 0.55%   |
| Si                                     | 101eV          |              |            | 1.25%   |
| C-C (Allylamine 1)                     | 285eV          | 47.77%       | 69.6%      | 48.64%  |
| C-OR + (/ C=N / C-N (Allylamine 2))    | 286.5eV        | 8.66%        | 23.93%     | 16.27%  |
| C=OR                                   | 287.5eV        | 4.13%        | 4.38%      | 2.77%   |
| C((=O)OR) + ((/RC(=O)NR (Allylamine 4) | 288.9eV        | 19.73%       | 2.90%      | 12.23%  |
| CC((=O)OR)                             | 285.7eV        | 19.72%       |            | 12.25%  |
| C-Si                                   | 284.1eV        |              |            | 7.84%   |
